# Supplementary material for: Senescence-Driven Inflammatory and Trophic Microenvironment Imprints Mesenchymal Stromal/Stem Cells in Osteoarthritic Patients
Source: MDPI journal article supplement (doi:10.3390/biomedicines11071994), 2023-07-14
Supplement: s1 [file s1]

# Senescence-Driven Inflammatory and Trophic Microenvironment Imprints Mesenchymal Stromal/Stem Cells in Osteoarthritic Patients

Giuseppe Fusi <sup>1</sup>, Michael Constantinides <sup>1</sup>, Christina Fissoun <sup>1</sup>, Lydiane Pichard <sup>2</sup>, Yves-Marie Pers <sup>1,3</sup>, Rosanna Ferreira-Lopez <sup>1,3</sup>, Veronique Pantesco <sup>1</sup>, Christophe Poulet <sup>4</sup>, Olivier Malaise <sup>4</sup>, Dominique De Seny <sup>4</sup>, Jean-Marc Lemaitre <sup>1,2</sup>, Christian Jorgensen <sup>1,3</sup> and Jean-Marc Brondello <sup>1,\*</sup>

- <sup>1</sup> IRMB, University Montpellier, INSERM, 34295 Montpellier, France; giuseppe.fusi@outlook.com (G.F.); michael.constantinides.89@gmail.com (M.C.); christina.fissoun@inserm.fr (C.F.); ym-pers@chu-montpellier.fr (Y.-M.P.); rosannaferreiralopez@gmail.com (R.F.-L.); veronique.pantesco@inserm.fr (V.P.); jean-marc.lemaitre@inserm.fr (J.-M.L.); christian.jorgensen@inserm.fr (C.J.)  
<sup>2</sup> SAFE-iPSC Facility INGESTEM, Montpellier University Hospital, 34298 Montpellier, France; lydiane.pichard@inserm.fr  
<sup>3</sup> Clinical Immunology and Osteoarticular Diseases Therapeutic Unit, Montpellier University Hospital, 34298 Montpellier, France  
<sup>4</sup> Laboratory and Service of Rheumatology, GIGA-I3, Université de Liège, 4000 Liege, Belgium; christophe.poulet@chuliege.be (C.P.); olivier.malaise@chuliege.be (O.M.); ddeseny@chuliege.be (D.D.S.)  
\* Correspondence: jean-marc.brondello@inserm.fr; Tel.: +33(0)4-67-33-57-19

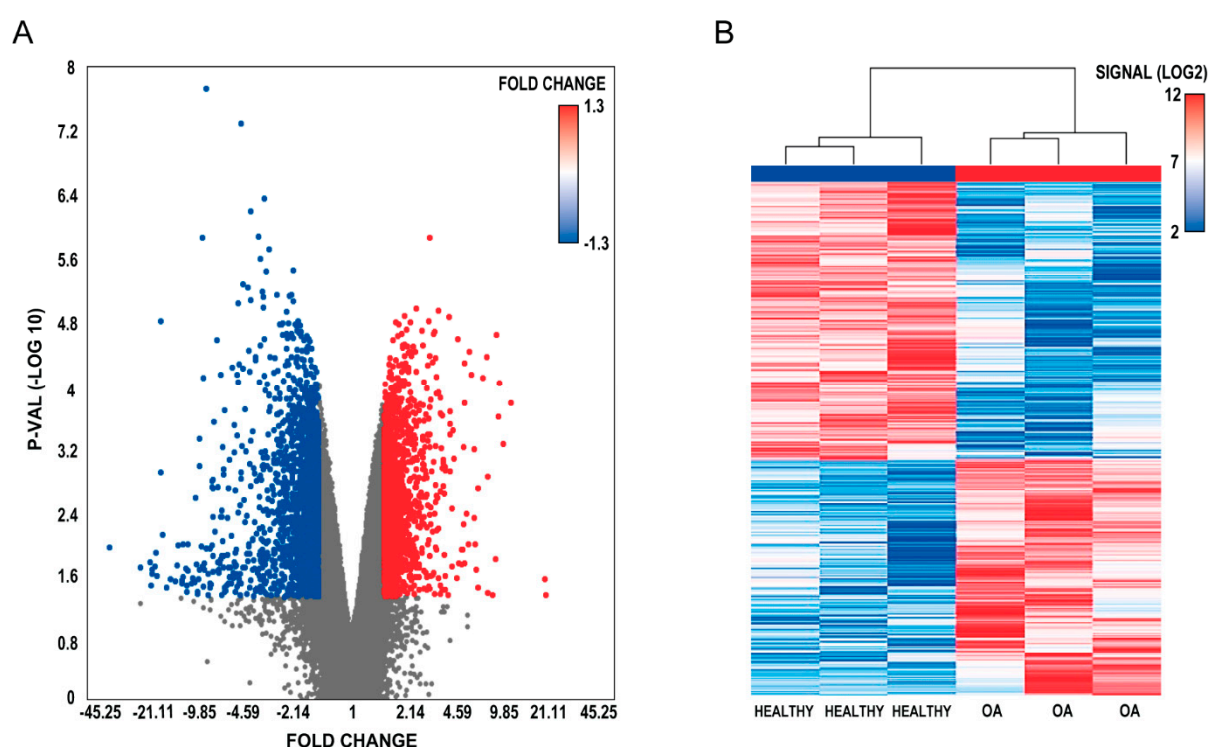

**Figure S1. Differential gene expression in MSC from patients with Osteoarthritis (OA) and MSC from healthy donors.** (A) Volcano plot for MSC isolated from patients with OA, showing the distribution of significance for all genes. Blue and red dots represent genes with significantly different relative expression (p-value < 0.05 and |Fold Change| > 1.3) compared with healthy

donors. (B) Heatmap showing that MSC isolated from patients with OA and from healthy donors can be differentiated based on the gene expression profile. Heatmap constructed using only significantly differentially genes (p-value < 0.05 and |Fold Change| > 1.3). Blue and red dots represent genes with significant relative expression changes (p-value < 0.05 and |Fold Change| > 1.3) in OA MSC compared with healthy MSC.

**Supplementary Table S1.** List of common differentially expressed genes between both IFN- $\gamma$  and TGF $\beta$ 1 MSC senescent models. (Probes bound to uncharacterized encoding genes were excluded).

| Gene Symbol                | IFN- $\gamma$ vs NT |          | TGF $\beta$ 1 vs NT |          |
|----------------------------|---------------------|----------|---------------------|----------|
|                            | Fold Change         | p-value  | Fold Change         | p-value  |
| ROR1                       | 1,7                 | 0,0014   | 2,17                | 0,0004   |
| G0S2                       | 1,89                | 0,0002   | 1,48                | 0,0042   |
| LOC100287497; LOC101926980 | 1,57                | 0,0082   | 1,57                | 0,0091   |
| ERRFI1                     | 2,18                | 0,0011   | 1,65                | 0,016    |
| LOC105376694               | 1,73                | 0,0284   | 1,58                | 0,0481   |
| FAM129A                    | 1,67                | 0,0213   | 1,39                | 0,0333   |
| AKR1C3                     | 1,32                | 0,0138   | 1,34                | 0,019    |
| ADIRF                      | 2,15                | 0,0016   | 2,47                | 0,0005   |
| AGAP11; BMS1P3; ADIRF      | 1,4                 | 0,0051   | 1,37                | 0,0013   |
| ITGA8                      | 11,49               | 0,0042   | 7,81                | 0,043    |
| ANK3                       | 2,29                | 0,0002   | 3,62                | 0,0001   |
| LRP5                       | 1,7                 | 0,0046   | 1,33                | 0,0283   |
| DYNC2H1                    | 1,73                | 0,0124   | 1,48                | 0,025    |
| AHNAK                      | 1,67                | 0,0082   | 1,44                | 0,0121   |
| CD248                      | 1,4                 | 0,015    | 2,18                | 0,0308   |
| TXNRD1                     | 1,37                | 0,0238   | 1,7                 | 9,68E-05 |
| APPL2                      | 1,99                | 0,0001   | 1,52                | 0,0114   |
| CEMIP                      | 2,22                | 0,0053   | 1,78                | 0,0368   |
| ACAN                       | 8,5                 | 6,34E-05 | 16,4                | 0,0028   |
| MNS1                       | 1,72                | 0,0005   | 1,5                 | 0,0025   |
| ADAMTS7                    | 2,75                | 0,0003   | 1,85                | 0,002    |
| FBXW10                     | 1,45                | 0,046    | 1,49                | 0,0291   |
| ANKRD20A5P                 | 2,16                | 0,001    | 1,76                | 0,0161   |
| ANKRD20A5P                 | 2,25                | 0,0037   | 2,44                | 0,0424   |
| MIR3975                    | 2,33                | 0,0113   | 1,87                | 0,0014   |
| NOTCH3                     | 2,57                | 0,0005   | 1,31                | 0,0259   |
| SOCS5                      | 1,53                | 0,0104   | 1,79                | 0,002    |
| ARL4C                      | 1,36                | 0,0271   | 2,2                 | 0,0076   |
| MCTS2P                     | 1,44                | 0,0018   | 1,43                | 0,0029   |
| COL6A1                     | 1,56                | 0,0006   | 1,33                | 0,0052   |
| PTPRG                      | 2,16                | 0,0218   | 1,6                 | 0,0064   |
| CSTA                       | 1,82                | 0,0005   | 1,61                | 0,0016   |
| PDIA5                      | 1,47                | 0,0199   | 1,75                | 0,0009   |
| PTX3                       | 1,58                | 0,0028   | 5,33                | 0,0007   |
| SNAR-I                     | 1,38                | 0,0408   | 2,74                | 0,0083   |
| TBL1XR1                    | 1,31                | 0,0065   | 1,31                | 0,0203   |
| LOC220729                  | 1,39                | 0,0003   | 1,54                | 0,0379   |
| PDE5A                      | 2,11                | 0,0003   | 2                   | 0,0011   |
| MARVELD2                   | 1,65                | 0,0004   | 1,91                | 0,0011   |
| MYCT1                      | 1,94                | 0,0147   | 2,1                 | 0,0042   |
| SNX9                       | 1,62                | 0,0077   | 2,43                | 0,0004   |
| TUBE1                      | 1,4                 | 0,0287   | 1,34                | 0,0232   |

|                            |       |          |       |          |
|----------------------------|-------|----------|-------|----------|
| MTURN                      | 1,32  | 0,0291   | 1,4   | 0,0329   |
| ELN                        | 6,04  | 2,73E-06 | 2,04  | 0,0003   |
| DPYSL2                     | 1,41  | 0,0109   | 1,43  | 0,0069   |
| DEPTOR                     | 3,13  | 9,10E-07 | 1,97  | 3,08E-05 |
| COL14A1                    | 9,09  | 9,04E-06 | 3,25  | 0,0006   |
| PNMA2                      | 1,3   | 0,0403   | 1,87  | 3,64E-05 |
| PABPC1                     | 1,64  | 0,0098   | 1,58  | 0,0008   |
| EIF3E                      | 1,33  | 0,0318   | 1,31  | 0,0293   |
| CNTNAP3B                   | 1,39  | 0,0198   | 1,42  | 0,0216   |
| LOC100287497; LOC101926980 | 1,77  | 0,0199   | 1,98  | 0,0138   |
| EPHB2                      | -2,15 | 0,0003   | -1,33 | 0,032    |
| PALMD                      | -1,74 | 0,0006   | -1,42 | 0,0293   |
| ADAMTS4                    | -1,91 | 0,0094   | -1,47 | 0,0024   |
| SNORA23                    | -1,62 | 0,0413   | -2,55 | 0,0382   |
| MIR3160-2                  | -1,48 | 0,0066   | -1,33 | 0,0173   |
| ACP2                       | -1,4  | 0,0181   | -1,46 | 0,0117   |
| CHST11                     | -1,46 | 0,0051   | -1,51 | 0,0012   |
| FKBP11                     | -1,39 | 0,0136   | -1,35 | 0,0079   |
| PCDH9                      | -1,74 | 0,0126   | -1,61 | 0,0092   |
| PLEK2                      | -1,37 | 0,0217   | -1,37 | 0,0043   |
| FRMD5                      | -2,14 | 0,0121   | -1,34 | 0,0443   |
| LCTL                       | -1,96 | 0,018    | -1,33 | 0,0073   |
| MT1CP                      | -1,7  | 0,014    | -1,69 | 0,0221   |
| HS3ST3A1                   | -1,31 | 0,0261   | -2,56 | 0,0006   |
| HOXB2                      | -1,79 | 0,0013   | -1,37 | 0,0144   |
| PLK5                       | -1,31 | 0,0373   | -1,3  | 0,0081   |
| ZNF175                     | -1,32 | 0,0317   | -1,37 | 0,0251   |
| TSEN34                     | -1,42 | 0,0022   | -1,34 | 0,0027   |
| ZNF569                     | -1,35 | 0,0052   | -1,42 | 0,0292   |
| NRP2                       | -2,37 | 6,11E-05 | -1,66 | 0,0072   |
| IGKV1-39; IGKC             | -1,37 | 0,0352   | -1,63 | 0,0314   |
| ANKRD44                    | -1,55 | 0,0021   | -1,34 | 0,0161   |
| DOCK10                     | -4,5  | 2,84E-05 | -2,41 | 0,0189   |
| TGM2                       | -1,78 | 0,0002   | -1,69 | 0,0024   |
| MRAS                       | -1,31 | 0,0249   | -1,34 | 0,006    |
| IL12A                      | -2,68 | 0,013    | -6,64 | 0,0295   |
| APBB2                      | -1,62 | 0,0205   | -1,32 | 0,0154   |
| SMIM3                      | -1,4  | 0,0094   | -1,36 | 0,0279   |
| OGFRL1                     | -1,4  | 0,0418   | -2,25 | 0,0004   |
| DCBLD1                     | -2    | 0,0146   | -1,41 | 0,0075   |
| LIMK1                      | -1,47 | 0,0024   | -1,58 | 0,0092   |
| GNG11                      | -3,38 | 0,0027   | -2,81 | 0,0057   |
| TCAF2                      | -1,34 | 0,042    | -1,37 | 0,0117   |
| SCARA3                     | -1,67 | 0,0066   | -1,31 | 0,0266   |
| ZNF703                     | -1,33 | 0,0065   | -1,42 | 0,034    |
| SGK223                     | -1,68 | 0,0001   | -1,56 | 0,0016   |
| CLU; MIR6843               | -3,05 | 0,0038   | -1,75 | 0,0267   |
| ZNF462                     | -1,89 | 3,07E-05 | -1,32 | 0,0302   |

**Supplementary Table S2.** Analytical clustering of common regulated genes between OA and in vitro induced-senescence MSC.

|      | Gene<br>Symbol | Matrisome | Canonical<br>Wnt Pathway<br>(DOWN) | AKT/mTOR<br>Pathway<br>(UP) | Cdc42/ROCK<br>Pathway (UP) | Bcl2<br>activation | ROS<br>production | References            |
|------|----------------|-----------|------------------------------------|-----------------------------|----------------------------|--------------------|-------------------|-----------------------|
| UP   | ADAMTS4        | X         |                                    |                             |                            |                    |                   | (1)                   |
|      | DOCK10         |           |                                    |                             | X                          |                    |                   | (3), (4)              |
|      | GNG11          |           |                                    | X                           | X                          | X                  | X                 | (5)                   |
|      | HS3ST3A1       | X         |                                    |                             |                            |                    |                   | (6), (7), (8)         |
|      | LIMK1          |           |                                    |                             | X                          |                    |                   | (9)                   |
|      | OGFRL1         |           |                                    | X                           |                            |                    |                   | (10)                  |
|      | PCDH9          | X         | X                                  |                             | X                          |                    |                   | (11), (12), (13)      |
|      | SCARA3         |           |                                    |                             |                            |                    | X                 | (14)                  |
|      | ZNF703         | X         | X                                  | X                           | X                          | X                  | X                 | (15), (16),(17), (18) |
|      | ACAN           | X         |                                    |                             |                            |                    |                   | (2)                   |
| DOWN | ADAMTS7        | X         |                                    |                             |                            |                    |                   | (19)                  |
|      | ANK3           |           | X                                  |                             |                            |                    |                   | (20)                  |
|      | ARL4C          |           |                                    |                             | X                          |                    |                   | (21)                  |
|      | CEMIP          | X         | X                                  |                             | X                          |                    |                   | (9), (22)             |
|      | DEPTOR         |           |                                    | X                           |                            |                    |                   | (23), (24)            |
|      | ELN            | X         |                                    |                             |                            |                    |                   | (2)                   |
|      | ERRFI1         |           |                                    | X                           |                            |                    |                   | (25)                  |
|      | G0S2           |           |                                    |                             |                            | X                  |                   | (26), (27), (28)      |
|      | ITGA8          | X         |                                    |                             |                            |                    |                   | (29)                  |
|      | LRP5           |           | X                                  |                             |                            |                    |                   | (30)                  |
|      | MARVELD2       | X         |                                    |                             |                            |                    |                   | (31)                  |
|      | MYCT1          |           |                                    |                             | X                          | X                  |                   | (32), (33)            |
|      | PTX3           | X         |                                    |                             |                            |                    |                   | (34)                  |
|      | ROR1           |           | X                                  |                             |                            |                    |                   | (35)                  |
|      | TXNRD1         |           | X                                  |                             |                            |                    | X                 | (36), (37), (38)      |

OA: Osteoarthritis; MSC: Mesenchymal Stem Cells.

|     |                                                                                                                                                                                                               |
|-----|---------------------------------------------------------------------------------------------------------------------------------------------------------------------------------------------------------------|
| (1) | Naito S, Shiomi T, Okada A, et al. Expression of ADAMTS4 (aggrecanase-1) in human osteoarthritic cartilage. <i>Pathol Int.</i> 2007;57(11):703-711. doi:10.1111/j.1440-1827.2007.02167.x                      |
| (2) | De Bari C, Dell'Accio F, Tylzanowski P and Luyten FP: Multipotent mesenchymal stem cells from adult human synovial membrane. <i>Arthritis &amp; Rheumatism</i> 44: 1928–1942, 2001.                           |
| (3) | Crossland H, Atherton PJ, Strömberg A, Gustafsson T and Timmons JA: A reverse genetics cell-based evaluation of genes linked to healthy human tissue age. <i>FASEB j</i> 31: 96–108, 2017.                    |
| (4) | Ruiz-Lafuente N, Minguela A, Muro M and Parrado A: The role of DOCK10 in the regulation of the transcriptome and aging. <i>Heliyon</i> 5: e01391, 2019.                                                       |
| (5) | Slorach EM, Chou J and Werb Z: Zeppo1 is a novel metastasis promoter that represses E-cadherin expression and regulates p120-catenin isoform expression and localization. <i>Genes Dev</i> 25: 471–484, 2011. |

|      |                                                                                                                                                                                                                                             |
|------|---------------------------------------------------------------------------------------------------------------------------------------------------------------------------------------------------------------------------------------------|
| (6)  | Durak O, de Anda FC, Singh KK, Leussis MP, Petryshen TL, Sklar P and Tsai L-H: Ankyrin-G regulates neurogenesis and Wnt signaling by altering the subcellular localization of $\beta$ -catenin. <i>Mol Psychiatry</i> 20: 388–397, 2015.    |
| (7)  | Hossain MN, Sakemura R, Fujii M and Ayusawa D: G-protein $\gamma$ subunit GNG11 strongly regulates cellular senescence. <i>Biochemical and Biophysical Research Communications</i> 351: 645–650, 2006.                                      |
| (8)  | Fu S, Fu Y, Chen F, Hu Y, Quan B and Zhang J: Overexpression of MYCT1 Inhibits Proliferation and Induces Apoptosis in Human Acute Myeloid Leukemia HL-60 and KG-1a Cells in vitro and in vivo. <i>Front Pharmacol</i> 9: 1045, 2018.        |
| (9)  | Lietman C, Wu B, Lechner S, et al.: Inhibition of Wnt/ $\beta$ -catenin signaling ameliorates osteoarthritis in a murine model of experimental osteoarthritis. <i>JCI Insight</i> 3: e96308, 2018.                                          |
| (10) | Williams-Pritchard G, Headrick JP, Peart JN. Myocardial Opioid Receptors in Conditioning and Cytoprotection. <i>Pharmaceuticals</i> . 2011; 4(3):470-484. <a href="https://doi.org/10.3390/ph4030470">https://doi.org/10.3390/ph4030470</a> |
| (11) | Agrawal P, Reynolds J, Chew S, Lamba DA and Hughes RE: DEPTOR Is a Stemness Factor That Regulates Pluripotency of Embryonic Stem Cells. <i>Journal of Biological Chemistry</i> 289: 31818–31826, 2014.                                      |
| (12) | Lyashenko N, Weissenböck M, Sharir A, Erben RG, Minami Y and Hartmann C: Mice lacking the orphan receptor <i>ror1</i> have distinct skeletal abnormalities and are growth retarded. <i>Dev Dyn</i> 239: 2266–2277, 2010.                    |
| (13) | Chen J and Long F: mTOR signaling in skeletal development and disease. <i>Bone Res</i> 6: 1, 2018.                                                                                                                                          |
| (14) | Luchetti MM, Piccinini G, Mantovani A, et al.: Expression and production of the long pentraxin PTX3 in rheumatoid arthritis (RA). <i>Clinical and Experimental Immunology</i> 119: 196–202, 2002.                                           |
| (15) | Matsumoto S, Fujii S and Kikuchi A: <i>Arl4c</i> is a key regulator of tubulogenesis and tumorigenesis as a target gene of Wnt- $\beta$ -catenin and growth factor-Ras signalling. <i>J Biochem</i> 161: 27–35, 2017.                       |
| (16) | Korpetinou A, Skandalis SS, Labropoulou VT, Smirlaki G, Noulas A, Karamanos NK and Theocharis AD: Serglycin: At the Crossroad of Inflammation and Malignancy. <i>Front Oncol</i> 3, 2014.                                                   |
| (17) | Yang X, Lu X, Lombès M, et al.: The G(0)/G(1) switch gene 2 regulates adipose lipolysis through association with adipose triglyceride lipase. <i>Cell Metab</i> 11: 194–205, 2010.                                                          |
| (18) | Heckmann BL, Zhang X, Xie X and Liu J: The G0/G1 switch gene 2 (G0S2): Regulating metabolism and beyond. <i>Biochimica et Biophysica Acta (BBA) - Molecular and Cell Biology of Lipids</i> 1831: 276–281, 2013.                             |
| (19) | Liu CJ, Kong W, Ilalov K, et al. ADAMTS-7: a metalloproteinase that directly binds to and degrades cartilage oligomeric matrix protein. <i>FASEB J</i> . 2006;20(7):988-990. doi:10.1096/fj.05-3877fje                                      |
| (17) | Chanalaris A, Clarke H, Guimond SE, Vincent TL, Turnbull JE and Troeberg L: Heparan Sulfate Proteoglycan Synthesis Is Dysregulated in Human Osteoarthritic Cartilage. <i>The American Journal of Pathology</i> 189: 632–647, 2019.          |
| (18) | Welch C, Santra MK, El-Assaad W, et al.: Identification of a Protein, G0S2, That Lacks Bcl-2 Homology Domains and Interacts with and Antagonizes Bcl-2. <i>Cancer Res</i> 69: 6782–6789, 2009.                                              |
| (19) | Kasper G, Mao L, Geissler S, et al.: Insights into Mesenchymal Stem Cell Aging: Involvement of Antioxidant Defense and Actin Cytoskeleton. <i>Stem Cells</i> 27: 1288–1297, 2009.                                                           |
| (20) | Wang C, Tao B, Li S, et al.: Characterizing the Role of PCDH9 in the Regulation of Glioma Cell Apoptosis and Invasion. <i>J Mol Neurosci</i> 52: 250–260, 2014.                                                                             |
| (21) | Lu M, Munger JS, Steadele M, Busald C, Tellier M and Schnapp LM: Integrin $\alpha 8 \beta 1$ mediates adhesion to LAP-TGF $\beta 1$ . <i>Journal of Cell Science</i> 115: 4641–4648, 2002.                                                  |
| (22) | Muri J, Heer S, Matsushita M, et al.: The thioredoxin-1 system is essential for fueling DNA synthesis during T-cell metabolic reprogramming and proliferation. <i>Nat Commun</i> 9: 1851, 2018.                                             |
| (23) | Ikenouchi J, Furuse M, Furuse K, Sasaki H, Tsukita S and Tsukita S: Tricellulin constitutes a novel barrier at tricellular contacts of epithelial cells. <i>Journal of Cell Biology</i> 171: 939–945, 2005.                                 |
| (24) | Niklason LE: Understanding the Extracellular Matrix to Enhance Stem Cell-Based Tissue Regeneration. <i>Cell Stem Cell</i> 22: 302–305, 2018.                                                                                                |
| (25) | Qu S-Y, Sun Y-Y, Li Y-H, Xu Z-M and Fu W-N: YY1 directly suppresses MYCT1 leading to laryngeal tumorigenesis and progress. <i>Cancer Medicine</i> 6: 1389–1398, 2017.                                                                       |
| (26) | Kumar A, Chalamalasetty RB, Kennedy MW, Thomas S, Inala SN, Garriock RJ and Yamaguchi TP: Zfp703 Is a Wnt/ $\beta$ -Catenin Feedback Suppressor Targeting the $\beta$ -Catenin/Tcf1 Complex. <i>Mol Cell Biol</i> 36: 1793–1802, 2016.      |

|      |                                                                                                                                                                                                                                        |
|------|----------------------------------------------------------------------------------------------------------------------------------------------------------------------------------------------------------------------------------------|
| (27) | Deroyer C, Charlier E, Neuville S, et al.: CEMIP (KIAA1199) induces a fibrosis-like process in osteoarthritic chondrocytes. <i>Cell Death Dis</i> 10: 103, 2019.                                                                       |
| (28) | Kumar A, Chalamalasetty RB, Kennedy MW, Thomas S, Inala SN, Garriock RJ and Yamaguchi TP: Zfp703 Is a Wnt/ $\beta$ -Catenin Feedback Suppressor Targeting the $\beta$ -Catenin/Tcf1 Complex. <i>Mol Cell Biol</i> 36: 1793–1802, 2016. |
| (29) | Han H: CSR, a scavenger receptor-like protein with a protective role against cellular damage causedby UV irradiation and oxidative stress. <i>Human Molecular Genetics</i> 7: 1039–1046, 1998.                                         |
| (30) | Chen L, Shi K, Andersen TL, Qiu W and Kassem M: KIAA1199 is a secreted molecule that enhances osteoblastic stem cell migration and recruitment. <i>Cell Death Dis</i> 10: 126, 2019.                                                   |
| (31) | Cairns J, Fridley BL, Jenkins GD, Zhuang Y, Yu J and Wang L: Differential roles of ERRF1 in EGFR and AKT pathway regulation affect cancer proliferation. <i>EMBO Rep</i> 19, 2018.                                                     |
| (32) | Gadea G and Blangy A: Dock-family exchange factors in cell migration and disease. <i>European Journal of Cell Biology</i> 93: 466–477, 2014.                                                                                           |
| (33) | Liang H, Gao K, Zhang Z, Jia R, Li J and Wang C: Functional mechanism of zinc finger protein 703 in in vitro esophageal carcinoma cell line. 7.                                                                                        |
| (34) | Dai B, Yoo S-Y, Bartholomeusz G, et al.: KEAP1-Dependent Synthetic Lethality Induced by AKT and TXNRD1 Inhibitors in Lung Cancer. <i>Cancer Res</i> 73: 5532–5543, 2013.                                                               |
| (35) | Mah KM and Weiner JA: Regulation of Wnt signaling by protocadherins. <i>Seminars in Cell &amp; Developmental Biology</i> 69: 158–171, 2017.                                                                                            |
